# Supplementary material
Source: Springer Nature journal article supplement (https://www.springermedizin.de/resource/supplementary/13047_2008_2_MOESM1_ESM.pdf/9662966)

hindfoot

forefoot

toes

nails

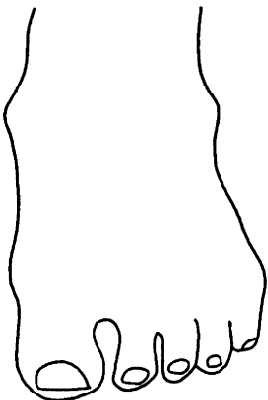

arch

ball

heel

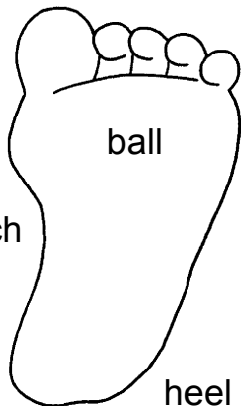

hindfoot

arch

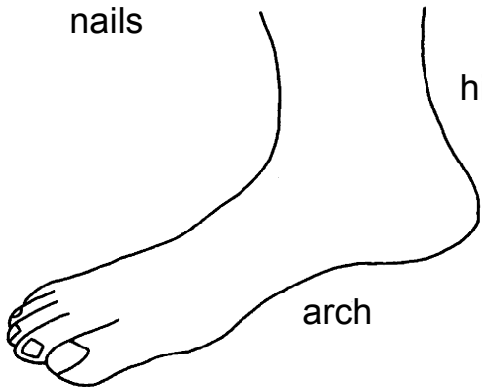

Supplement: MOESM1 [file 9662966]
